# Supplementary material for: Morphology and transport characterization of solution-processed rubrene thin films on polymer-modified substrates
Source: PubMed Central journal article supplement (PMC7376014; doi:10.1038/s41598-020-68293-8), 2020-07-22
Supplement: 41598_2020_68293_MOESM1_ESM.pdf [file 41598_2020_68293_MOESM1_ESM.pdf]

## Supplementary Information

### Morphology and transport characterization of solution-processed rubrene thin films on polymer-modified substrates

Xujing Gao<sup>1</sup>, Wentao Liu<sup>1,\*</sup>, Hao Liu<sup>1,\*</sup>, Miaoming Huang<sup>1,\*</sup>, Suqin He<sup>1,2</sup>, Manman Zhang<sup>1</sup>, Zhengxia Hua<sup>1</sup>, and Chengshen Zhu<sup>1</sup>

<sup>1</sup> School of material science and engineering, Zhengzhou University, Zhengzhou 450001, China

<sup>2</sup> Henan Key Laboratory of Advanced Nylon Materials and Application, Zhengzhou University, Zhengzhou, 450001, China.

\*Correspondence: wtliu@zzu.edu.cn; hliu@zzu.edu.cn; mmhuang@zzu.edu.cn (F.L.) +86-0371-67781590;

Table S1. Contact angle and surface energy of silicon, FTO and FTO/polymer film

|          | Contact angle (°) |                            | Surface energy $\gamma_{SV}$<br>(mJ/m <sup>2</sup> ) |
|----------|-------------------|----------------------------|------------------------------------------------------|
|          | Water $\theta_1$  | Ethylene glycol $\theta_2$ |                                                      |
| silicon  | 52.5              | 40.8                       | 48.1 ± 1.5                                           |
| FTO      | 59                | 36.4                       | 47.6 ± 0.9                                           |
| FTO/PBSA | 69.7              | 46.9                       | 41.5 ± 0.3                                           |
| FTO/PS   | 90.4              | 65.6                       | 33.1 ± 1.5                                           |
| FTO/PLA  | 76.2              | 55.4                       | 36.3 ± 0.7                                           |

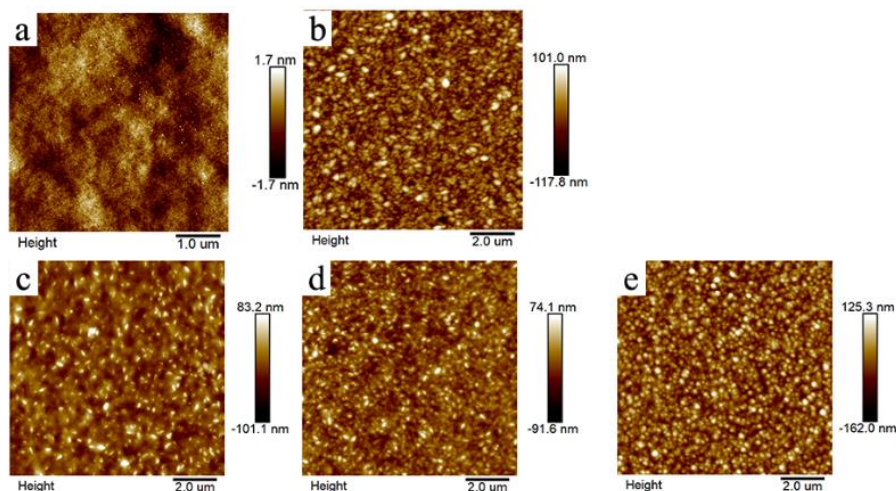

Figure S1. Atomic force microscopy images of FTO and FTO/polymer film (a. Si, b. FTO, c. FTO/PBSA, d. FTO/PS, e. FTO/PLA.)

Table S2. The surface roughness of different substrates

|          | Image $R_q$ (nm) | Image $R_a$ (nm) |
|----------|------------------|------------------|
| Si       | 0.49             | 0.38             |
| FTO      | 24.5             | 19.4             |
| FTO/PBSA | 30.9             | 24.1             |
| FTO/PS   | 26.9             | 23.5             |
| FTO/PLA  | 31.9             | 25.3             |

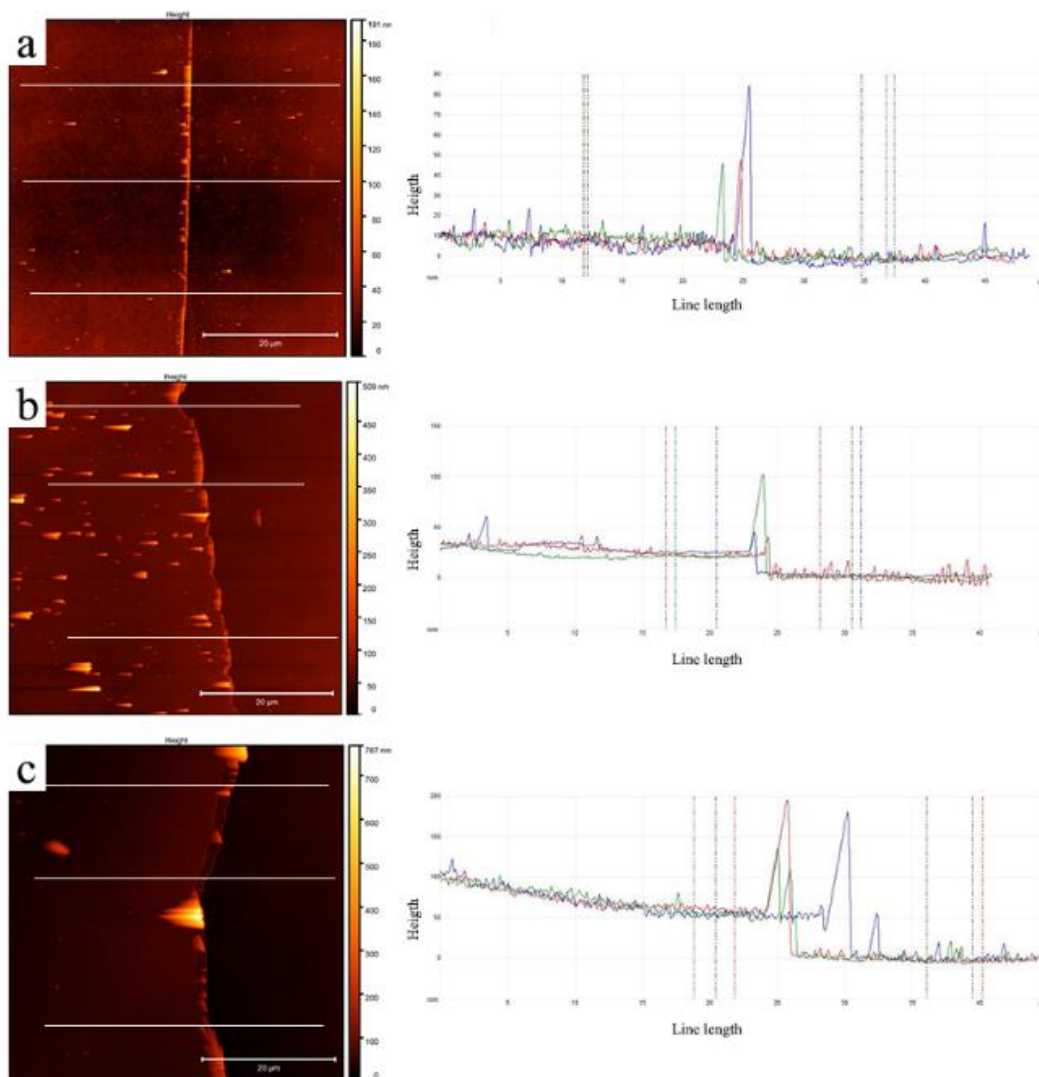

Figure S2. Atomic force microscopy images of PLA films on silicon substrates (PLA concentrations are a. 1, b. 3 and c. 5 mg/mL, respectively.)

Table S3. The thicknesses of PLA films for PLA solution with different concentrations

| Solution concentration<br>(mg/mL) | Film average thickness<br>(nm) |
|-----------------------------------|--------------------------------|
| 1                                 | 12.6                           |
| 3                                 | 22.2                           |
| 5                                 | 57.2                           |

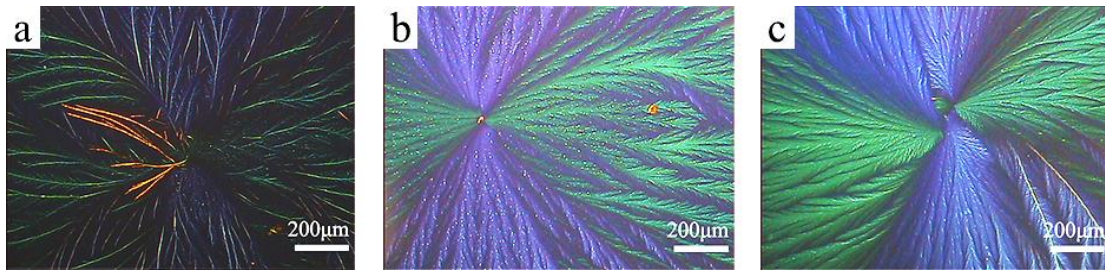

Figure S3. Polarized optical microscopy images of the central regions of PLA/rubrene crystal films fabricated by spin-coating different concentration rubrene solutions on 57.2 nm PLA modified FTO wafers after the solvent vapor annealing procedure. (Rubrene concentrations are a. 3, b. 5 and c. 9 mg/ml, respectively.)

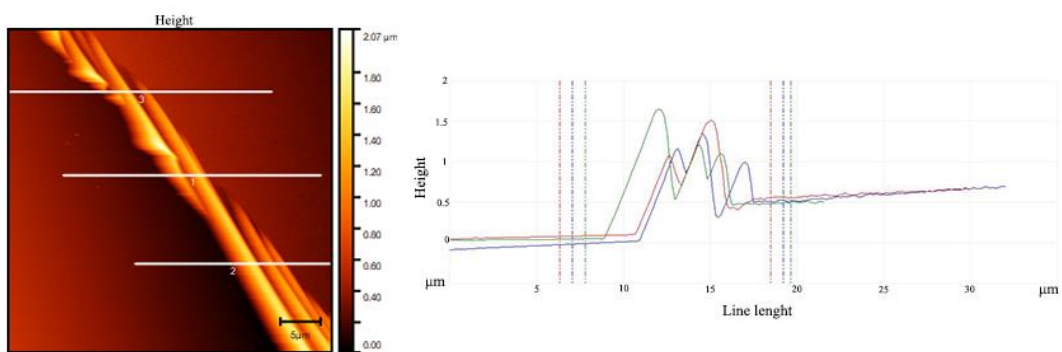

Figure S4. Atomic force microscopy image of PET films on a silicon substrate, the average thickness of PET film is 517.2 nm.
